# Supplementary material
Source: PubMed Central journal article supplement (PMC8152103)
Supplement: NIHMS1690163-supplement-2.pdf [file NIHMS1690163-supplement-2.pdf]

## **Supplement: Supplementary Material\***

Qaseem A, Crandall CJ, Mustafa RA, et al; Clinical Guidelines Committee of the American College of Physicians. Screening for colorectal cancer in asymptomatic average-risk adults: a guidance statement from the American College of Physicians. *Ann Intern Med.* 15 October 2019. [Epub ahead of print]. doi:10.7326/M19-0642

Supplement Table: Summary of Evidence on Colorectal Cancer Screening from CTFPHC and USPSTF Guidelines and Evidence Reviews

\* This supplementary material was provided by the authors to give readers further details on their article. The material was reviewed but not copyedited.

## Supplement Table: Summary of Evidence on Colorectal Cancer Screening from CTFPHC and USPSTF Guidelines and Evidence Reviews

(Blue shading = data from CTFPHC and Green shading = data from USPSTF)

| Screening Modalities/Frequency/ Follow-up                                                                                                                                                                                                                                                                                                                                                                                             | Sensitivity/ Specificity                                                                                   | CRC-specific Mortality                                                                                                                                                                                                              | CRC-specific Mortality by Age Group                                                                                                                                                                                                                                                                                                                    | All-cause mortality                                                                                                                   | Harms                                                                                                                                                                                                                                            | Other Considerations                                                                                                                                                                                                                                                                                                                                                                                                                                                                                                                                                                                                                                                                                         |
|---------------------------------------------------------------------------------------------------------------------------------------------------------------------------------------------------------------------------------------------------------------------------------------------------------------------------------------------------------------------------------------------------------------------------------------|------------------------------------------------------------------------------------------------------------|-------------------------------------------------------------------------------------------------------------------------------------------------------------------------------------------------------------------------------------|--------------------------------------------------------------------------------------------------------------------------------------------------------------------------------------------------------------------------------------------------------------------------------------------------------------------------------------------------------|---------------------------------------------------------------------------------------------------------------------------------------|--------------------------------------------------------------------------------------------------------------------------------------------------------------------------------------------------------------------------------------------------|--------------------------------------------------------------------------------------------------------------------------------------------------------------------------------------------------------------------------------------------------------------------------------------------------------------------------------------------------------------------------------------------------------------------------------------------------------------------------------------------------------------------------------------------------------------------------------------------------------------------------------------------------------------------------------------------------------------|
| <p><b>gFOBT</b></p> <p>Hemoccult II</p> <p>4 RCTs: n=313,180 (156,737 [I]; 156,443[C]); 1 RCT: 2-3 screens in 21-24 mo, f/u 9 yr; 1 RCT: 9 biennial screens; f/u 17 yr; 1 RCT 4-6 biennial screens; f/u 19.5 yr; 1 RCT annual or biennial screening; f/u 30 yr; Overall f/u: 9 to 30 yr</p> <p>5 RCTs: n=419,966 217,966[I];202,000[C]; 5 RCTs: 2 to 9 biennial screens; f/u 30 yr; 1 RCT: 11 rounds of annual screens; f/u 30 yr</p> | <p>Median sensitivity: 47.1% (range 12.9%-75.0%)</p> <p>Median specificity: 96.1% (range 90.1%-98.1%);</p> | <p>RR, 0.82 (95% CI, 0.73 to 0.92, I<sup>2</sup>=67%);</p> <p>ARR: 2,654/million (95%CI, 1,128-4,010 fewer)</p> <p>Number needed to screen (NNS): 377 (95% CI, 249-887), 1 modeling study: 55% reduction</p> <p>GRADE: Moderate</p> | <p>1 RCT: Age &lt;60y Annual: RR, 0.82 (95%CI, 0.59 to 1.14) Biennial: RR, 0.90 (95%CI, 0.65 to 1.24)</p> <p>Ages 60-69y Annual: RR, 0.58 (95%CI,0.43 to 0.78) Biennial: RR, 0.67 (95%CI, 0.51 to 0.89)</p> <p>Ages &gt;70y Annual: RR, 0.47 (95%CI, 0.26 to 0.84). Biennial: RR, 0.66 (95% CI 0.35 to 1.26)</p> <p>1 RCT (Biennial): Age &lt;60y:</p> | <p>4 RCTs RR, 1.00 (95% CI, 1.00 to 1.01, I<sup>2</sup>=0%)</p> <p>ARR: 901/million (2,371 fewer to 4,172 more)</p> <p>GRADE: Low</p> | <p>False positives: 2 uncontrolled studies: 12.2 per 1,000 (95%CI, 10.7 to 13.7);</p> <p>False negatives: 3 uncontrolled studies: 5.5 per 1,000 (95%CI, 2.8 to 8.2)</p> <p>GRADE: Very low</p> <p>Overdiagnosis/Overtreatment: Not available</p> | <p>Benefits: Non-invasive procedure, simplicity, comfort, lack of invasiveness, ease, convenience, time, cost, and privacy</p> <p>Harms: Confusing instructions, discomfort, embarrassment and adverse effects associated with the FOBT</p> <p>Benefits: No bowel preparation, anesthesia, or transportation to a facility required</p> <p>3 Modeling studies: Benefits: Life-years gained per 1000 individuals screened: HS gFOBT every year: 247 CRC deaths averted per 1000 individuals screened: 22</p> <p>Harms: Complications (GI and CV events) of CRC screening and follow-up testing per 1000 individuals screened:11 Burden: Lifetime No. of colonoscopies per 1000 individuals screened: 2253</p> |

| Screening Modalities/Frequency/ Follow-up                           | Sensitivity/ Specificity                                                                                                                                                                                                                                                                                                   | CRC-specific Mortality                                                                                                                                                            | CRC-specific Mortality by Age Group                                                              | All-cause mortality | Harms                                                                                                                                                                                                                                                                                                                                                                                                                                                                                                                                                                 | Other Considerations                                                                                                                                                                                                                                                                                                                                                                                                                                                                                                                                                                           |
|---------------------------------------------------------------------|----------------------------------------------------------------------------------------------------------------------------------------------------------------------------------------------------------------------------------------------------------------------------------------------------------------------------|-----------------------------------------------------------------------------------------------------------------------------------------------------------------------------------|--------------------------------------------------------------------------------------------------|---------------------|-----------------------------------------------------------------------------------------------------------------------------------------------------------------------------------------------------------------------------------------------------------------------------------------------------------------------------------------------------------------------------------------------------------------------------------------------------------------------------------------------------------------------------------------------------------------------|------------------------------------------------------------------------------------------------------------------------------------------------------------------------------------------------------------------------------------------------------------------------------------------------------------------------------------------------------------------------------------------------------------------------------------------------------------------------------------------------------------------------------------------------------------------------------------------------|
|                                                                     |                                                                                                                                                                                                                                                                                                                            |                                                                                                                                                                                   | RR, 0.96 (95% CI, 0.85 to 1.10)<br><br>Age 60-69 y: (Mortality Rate, 0.87 (95% CI, 0.79 to 0.97) |                     |                                                                                                                                                                                                                                                                                                                                                                                                                                                                                                                                                                       |                                                                                                                                                                                                                                                                                                                                                                                                                                                                                                                                                                                                |
| <b>FIT</b><br>1 RCT: n=192,261 (94,423 [I]; 97,838 [C])<br>f/u 8 yr | Median sensitivity: 81.5% (range, 53.3%-100%)<br><br>Median specificity: 95.0% (range, 87.2%-96.9%)<br><br>Sensitivity (range, 73%-88%); specificity (range, 91%-96%); single stool specimen; 18 FIT families; Prospective diagnostic accuracy: 6 Qualitative (n=36,808); 7 Quantitative (n=40, 134) Quality: Fair to good | RR, 0.88 (95% CI, 0.72 to 1.07); ARR, 277/million (95%CI, 631 fewer to 151 more), NNS 209 (95%CI, 41-430);<br><br>1 modeling study (Markov): 74% reduction<br><br>GRADE: Moderate | NA                                                                                               |                     | False-Positives:<br>2 uncontrolled studies: cut-point 50 ng/ml: 128.9 per 1,000 (95%CI, 124.6 to 133.2)<br><br>2 uncontrolled studies; cut-point 70-75 ng/ml: 93.7 per 1,000 (95% CI, 72.0 to 115.4)<br><br>3 uncontrolled studies; cut-point 100 ng/ml: 55.5 per 1,000 (95% CI, 22.0 to 88.9)<br><br>Overall: 87.9 per 1,000 (95%CI, 52.4, 123.4);<br>Grade: Very Low<br><br>False Negatives:<br>1 uncontrolled study, cut-point 50 ng/ml: 1.3 per 1,000 (95%CI, 0.2 to 7.3)<br><br>2 uncontrolled studies; cut-point 70-75 ng/ml: 0.2 per 1,000 (95%CI, 0.1 to 0.2) | Harms: Lack of awareness; embarrassment; false positives leading to unnecessary additional follow-up tests, such as colonoscopy<br><br>Benefits: No bowel preparation, anesthesia, or transportation to a facility required<br><br>3 Modeling studies: Benefits: Life-years gained per 1000 individuals screened: FIT every year: 244; CRC deaths averted per 1000 individuals screened: 22<br><br>Harms: Complications (GI and CV events) of CRC screening and follow-up testing per 1000 individuals screened: 10; Burden: Lifetime No. of colonoscopies per 1000 individuals screened: 1757 |

| Screening Modalities/Frequency/ Follow-up                                                                                                                                                                                                                      | Sensitivity/ Specificity | CRC-specific Mortality                                                                                                                                                                                                                                                                                                | CRC-specific Mortality by Age Group                                                                   | All-cause mortality                                                                                                                       | Harms                                                                                                                                                                                                                                                                                                                                                                                                                                                                                                                                                                                                                                                                                                                                                                                                                                                                                | Other Considerations                                                                                                                                                                                                                                                                                                                                                                                                                                                                                                                                                                                                                 |
|----------------------------------------------------------------------------------------------------------------------------------------------------------------------------------------------------------------------------------------------------------------|--------------------------|-----------------------------------------------------------------------------------------------------------------------------------------------------------------------------------------------------------------------------------------------------------------------------------------------------------------------|-------------------------------------------------------------------------------------------------------|-------------------------------------------------------------------------------------------------------------------------------------------|--------------------------------------------------------------------------------------------------------------------------------------------------------------------------------------------------------------------------------------------------------------------------------------------------------------------------------------------------------------------------------------------------------------------------------------------------------------------------------------------------------------------------------------------------------------------------------------------------------------------------------------------------------------------------------------------------------------------------------------------------------------------------------------------------------------------------------------------------------------------------------------|--------------------------------------------------------------------------------------------------------------------------------------------------------------------------------------------------------------------------------------------------------------------------------------------------------------------------------------------------------------------------------------------------------------------------------------------------------------------------------------------------------------------------------------------------------------------------------------------------------------------------------------|
| <p><b>Flexible Sigmoidoscopy</b></p> <p>4 RCTs: 413,955 (165,333 [I]; 248,622 [C]); 3 RCTs: once only screen; 1 RCT: one screening at baseline then one at 3 or 5 yr; f/u: 6 to 11.9 yr.</p> <p>4 RCTs: n=458,002; 1 or 2-time flex sig; f/u: 11 to 12 yr.</p> | NA                       | <p>RR, 0.72 (95% CI; 0.65 to 0.81) ARR, 1,176 per million (95% CI; 830 to 1,486 fewer); NNS: 850 (95% CI, 673-1205);</p> <p>GRADE: Moderate</p> <p>IRR (4 RCTs), 0.73; 95% CI, 0.66 to 0.82). Mortality benefit was limited to distal CRC (f, 0.63; 95% CI, 0.49-0.84; I<sup>2</sup> = 44%); GRADE: Fair (USPSTF)</p> | <p>55-64 y (1 RCT), RR, 0.84 (95% CI, 0.67, 1.06)</p> <p>65-74 y, RR, 0.65 (95% CI, 0.52 to 0.82)</p> | <p>4 RCTs: RR, 0.99 (95% CI, 0.97 to 1.01, I<sup>2</sup>=35%) ARR:1,838/million (95% CI, 4,704 fewer to 1,095 more)</p> <p>GRADE: Low</p> | <p>2 uncontrolled studies; cut-point 100 ng/ml: 0.83 per 1,000 (95%CI, 0.0 to 1.67)</p> <p>Overall: 0.69 per 1,000 (-0.02 to 1.41)<br/>Grade: Very Low</p> <p>Death: 1 uncontrolled study; No. of tests: 0.15 per 1,000 (95%CI, 0.07 to 0.32)</p> <p>Perforation: 3 uncontrolled studies; No. of tests: 0.03 per 1,000 (95%CI, 0.0 to 0.07)</p> <p>4 uncontrolled studies: No. of patients: 0.01 per 1,000 (95%CI, 0.0 to 0.03)</p> <p>Overall: 0.02 per 1,000 (95%CI, -0.00 to 0.04)</p> <p>16 observational studies: (n = 137, 987) pooled point estimate, 1 perforation in 10,000 procedures (95% CI, 0.4-1.4 in 10,000)</p> <p>Event Rate per 10,000: 0.74 (0.40-1.35)</p> <p>Major Bleeding (requiring hospitalization): 2 uncontrolled studies; No. of patients: 0.09 per 1,000 (95%CI, 0.04 to 0.15)</p> <p>10 observational studies; 2 major bleeds in 10,000 procedures</p> | <p>Benefits: Physician recommendation, greater screening readiness, confidence in completing a test, and perceived pros of screening</p> <p>Harms: Perforation anxiety</p> <p>3 Modeling studies:<br/>Benefits: Life-years gained per 1000 individuals screened: Flexible sigmoidoscopy every 5 y: 221;<br/>CRC deaths averted per 1000 individuals screened: 20;<br/>Harms: Complications (GI and CV events) of CRC screening and follow-up testing per 1000 individuals screened: 10<br/>Burden: Lifetime No. of colonoscopies per 1000 individuals screened: 1820</p> <p>Test availability has declined in the United States.</p> |

| Screening Modalities/Frequency/Follow-up                                             | Sensitivity/Specificity                                                                                                                       | CRC-specific Mortality                                                                                                     | CRC-specific Mortality by Age Group | All-cause mortality | Harms                                                                                                                                                                                                                                                                                                                                                                                                                                                                                                                                       | Other Considerations |
|--------------------------------------------------------------------------------------|-----------------------------------------------------------------------------------------------------------------------------------------------|----------------------------------------------------------------------------------------------------------------------------|-------------------------------------|---------------------|---------------------------------------------------------------------------------------------------------------------------------------------------------------------------------------------------------------------------------------------------------------------------------------------------------------------------------------------------------------------------------------------------------------------------------------------------------------------------------------------------------------------------------------------|----------------------|
|                                                                                      |                                                                                                                                               |                                                                                                                            |                                     |                     | Event Rate per 10,000 Procedures: 1.8 (95% CI 0.70-4.4)                                                                                                                                                                                                                                                                                                                                                                                                                                                                                     |                      |
|                                                                                      |                                                                                                                                               |                                                                                                                            |                                     |                     | Minor Bleeding (not requiring hospitalization): 2 uncontrolled studies<br>No. tests: 0.0 per 1,000 (95%CI, 0.0 to 0.3)<br><br>5 uncontrolled studies: No. Patients: 0.50 per 1,000 (95%CI, 0.25 to 0.74)<br><br>Overall: 0.36 per 1,000 (95%CI, 0.16 to 0.56)<br>GRADE: Very Low                                                                                                                                                                                                                                                            |                      |
|                                                                                      |                                                                                                                                               |                                                                                                                            |                                     |                     | Other SAE from 13 prospective and 5 retrospective studies: hospitalization, ED, CVD, hernia, severe pain, hypotension, syncope, PE, MI, colitis, seizure, severe diarrhea, diverticulitis, long term complications, GI issues<br>Death: 1 uncontrolled study; No. of tests: 0.3 per 1,000 (95%CI, 0.2 to 0.6)<br>2 uncontrolled studies; No. of patients: 0.02 per 1,000 (95%CI, 0.0 to 0.1);<br>Overall: 0.2 per 1,000 (95%CI, -0.1 to 0.4)<br><br>Perforation: 3 uncontrolled studies; No. of tests: 0.41 per 1,000 (95%CI, 0.19 to 0.62) |                      |
| <b>Screening colonoscopy</b><br>4 prospective diagnostic accuracy studies; n= 4,821: | Sensitivity ≥10 mm adenomas: 89% (95% CI, 78%-96%) to 98% (95% CI, 74%-100%); ≥6 mm adenomas: 75% (95% CI, 63%-84%) to 93% (95% CI, 88%-96%). | Data from modeling studies only.<br><br>Markov modeling study: 83% reduction<br><br>MISCAN modeling study: 51.9% reduction | NA                                  | NA                  |                                                                                                                                                                                                                                                                                                                                                                                                                                                                                                                                             |                      |

| Screening Modalities/Frequency/Follow-up | Sensitivity/Specificity | CRC-specific Mortality                 | CRC-specific Mortality by Age Group | All-cause mortality | Harms                                                                                                                                                                                                                                                                                                                                                                                                                                                                                                                                                                                                                                                                                                                                                                                                                                                                                                                                                                                                                   | Other Considerations |
|------------------------------------------|-------------------------|----------------------------------------|-------------------------------------|---------------------|-------------------------------------------------------------------------------------------------------------------------------------------------------------------------------------------------------------------------------------------------------------------------------------------------------------------------------------------------------------------------------------------------------------------------------------------------------------------------------------------------------------------------------------------------------------------------------------------------------------------------------------------------------------------------------------------------------------------------------------------------------------------------------------------------------------------------------------------------------------------------------------------------------------------------------------------------------------------------------------------------------------------------|----------------------|
|                                          |                         | SimCRC modeling study: 80.6% reduction |                                     |                     | <p>5 uncontrolled studies; No. per patients: 0.53 per 1,000 (95%CI, 0.37 to 0.69)<br/>Overall: 0.49 per 1,000 (95%CI, 0.36 to 0.62).<br/>GRADE: Very Low</p> <p>26 observational studies; (n = 3,414,108); Event Rate per 10,000 procedures: 3.6 (95%CI, 2.4-5.4); 4 perforations/10,000 procedures (95% CI, 2-5/10,000)</p> <p>Major Bleeding (requiring hospitalization): 1 uncontrolled study; No. of tests: 0.0 per 1,000 (95%CI, 0.0 to 11.7)<br/>3 uncontrolled studies: No. of patients: 1.08 per 1,000 (95%CI, 0.85 to 1.32)<br/>Overall: 1.08 per 1,000 (95%CI, 0.8 to 1.3)</p> <p>22 studies: Event Rate per 10,000 procedures, 8.2 (95% CI, 5.0-13.5)<br/>8 major bleeds/10,000 procedures (95% CI, 5-14/10,000)</p> <p>29 Prospective studies: 8,389 SAEs, more invasive, procedural complications, harms of overdiagnosis and overtreatment of smaller lesions (ie, &lt;10 mm), operator dependent, aggressive bowel preparation</p> <p>Minor Bleeding (not requiring hospitalization): 1 uncontrolled</p> |                      |

| Screening Modalities/Frequency/Follow-up                                                               | Sensitivity/Specificity                                                                                                                                                                                                                                                                                                    | CRC-specific Mortality | CRC-specific Mortality by Age Group | All-cause mortality | Harms                                                                                                                                                                                                                                                                                                                                                                                                                                                                                                                                                                                                                                                                                                                                                                                                                                                                                                                                                                      | Other Considerations                                                                                                                                                                                                                                                                                                                                                                                       |
|--------------------------------------------------------------------------------------------------------|----------------------------------------------------------------------------------------------------------------------------------------------------------------------------------------------------------------------------------------------------------------------------------------------------------------------------|------------------------|-------------------------------------|---------------------|----------------------------------------------------------------------------------------------------------------------------------------------------------------------------------------------------------------------------------------------------------------------------------------------------------------------------------------------------------------------------------------------------------------------------------------------------------------------------------------------------------------------------------------------------------------------------------------------------------------------------------------------------------------------------------------------------------------------------------------------------------------------------------------------------------------------------------------------------------------------------------------------------------------------------------------------------------------------------|------------------------------------------------------------------------------------------------------------------------------------------------------------------------------------------------------------------------------------------------------------------------------------------------------------------------------------------------------------------------------------------------------------|
| <p><b>Screening CT Colonoscopy (CTC)</b></p> <p>9 Prospective diagnostic accuracy studies; n=6,497</p> | <p>Sensitivity ≥10 mm adenomas<br/>67% (95% CI, 45%-84%) to 94% (95% CI, 84%-98%), and specificity ranged from 98% (95% CI, 96%-99%) to 96% (95% CI, 95%-97%).</p> <p>Sensitivity ≥ 6 mm adenomas<br/>73% (95% CI, 58%-84%) to 98% (95% CI, 91%-100%); Specificity from 89% (95% CI, 84%-93%) to 91% (95% CI, 88%-93%)</p> | NA                     | NA                                  | NA                  | <p>study: No. of tests: 2.68 per 1,000 (95%CI, 2.21 to 3.25)<br/>4 uncontrolled studies; No. of patients: 0.84 per 1,000 (95%CI, 0.0 to 2.0)<br/>Overall: 1.65 per 1,000 (95%CI, -0.05 to 3.3)<br/>GRADE: Very Low</p> <p><b>Perforation:</b> 1 uncontrolled study; No. of patients: 0.0 per 1,000 (95%CI, 0.0 to 0.3).<br/>GRADE: Very Low</p> <p>15 observational studies: (n= 75 354); Risk of perforation for screening CTC &lt;2/10,000 examinations</p> <p><b>Ionizing radiation:</b> 4 diagnostic accuracy studies Exposure to low-dose ionizing radiation 1-7 mSv</p> <p>Incidental extracolonic findings, SAEs: 21 Prospective and retrospective studies: (n = 38,293);identification in 27% to 69% of examinations; 5%-37% necessitate diagnostic follow-up; ≤3% required any type of definitive treatment</p> <p>15 observational studies: 104 SAEs, low rate of bowel perforation from insufflation, operator dependent, unclear evidence about cumulative</p> | <p>Benefits: Non-invasiveness, avoidance of sedation/anesthesia, ability to drive after the test, avoidance of normal colonoscopy, risks, identifying abnormalities outside the colon, and mild or no discomfort</p> <p>Harms: Abdominal pain, discomfort, diarrhea, flatulence, CO2 insufflation, the breath hold, loss of dignity, pain, feelings of disrespect, mild bloating and moderate cramping</p> |

| Screening Modalities/Frequency/Follow-up | Sensitivity/Specificity | CRC-specific Mortality | CRC-specific Mortality by Age Group | All-cause mortality | Harms                                                                                                                                                                                                                                                                                                                                                                                                                                                                                                                                                                                                                                                                                                                                                                                                                                                                                                                                                                                                                                                                | Other Considerations |
|------------------------------------------|-------------------------|------------------------|-------------------------------------|---------------------|----------------------------------------------------------------------------------------------------------------------------------------------------------------------------------------------------------------------------------------------------------------------------------------------------------------------------------------------------------------------------------------------------------------------------------------------------------------------------------------------------------------------------------------------------------------------------------------------------------------------------------------------------------------------------------------------------------------------------------------------------------------------------------------------------------------------------------------------------------------------------------------------------------------------------------------------------------------------------------------------------------------------------------------------------------------------|----------------------|
|                                          |                         |                        |                                     |                     | <p>radiation exposure to small excess risk of cancer</p> <p>Overall quality: fair</p> <p>Harms: There is insufficient evidence about the potential harms of associated extracolonic findings, which are common.</p> <p>Serious events: Prospective Studies (11);Retrospective Studies (4): Collapse (1/982); MI (1/982); CVA (1/982); Hospitalizations (2/2531); Severe nausea and vomiting (1/2531); Major bleeding events (4); Self-limiting vasovagal episodes: (63)</p> <p>Extra-colonic findings: additional diagnostic evaluation; surgical resection; additional diagnostic imaging; cancers etc.</p> <p>3 Modeling studies:</p> <p>Benefits: Life-years gained per 1000 individuals screened: CT colonography every 5 y : 248</p> <p>Colorectal cancer deaths averted per 1000 individuals screened: 22</p> <p>Harms: Complications (gastrointestinal and cardiovascular events) of colorectal cancer screening and follow-up testing per 1000 individuals screened: 10</p> <p>Burden: Lifetime No. of colonoscopies per 1000 individuals screened: 1743</p> |                      |



ARR: Absolute risk reduction; CT: Computed tomography; CV: Cardiovascular; CVA: Cerebrovascular accident; ED: Emergency department; FIT: Fecal immunochemical test; FP: False positive; FN: False negative; FS: Flexible sigmoidoscopy; F/U: Follow-up; gFOBT: Guaiac Fecal Occult Blood Test; GI: gastrointestinal; HSgFOBT: High-sensitivity Guaiac Fecal Occult Blood Test; IRR: Incidence rate ratio; MI: myocardial infarction; NNS: Number needed to screen; PE: Pulmonary embolism; RCT: Randomized controlled trial; RR: Relative risk; SAE: Serious adverse event
